# Supplementary material for: The Tc1/mariner transposable element family shapes genetic variation and gene expression in the protist Trichomonas vaginalis
Source: PubMed Central journal article supplement (PMC4021607; doi:10.1186/1759-8753-5-12), 2014-04-24
Supplement: 1759-8753-5-12-S1.pdf [file 1759-8753-5-12-S1.pdf]

Genomic alignment visualization showing sequence coordinates (10-160) and consensus sequences. The image displays multiple rows of DNA sequence alignments with various annotations such as asterisks, arrows, and boxes highlighting specific regions. The consensus sequence is provided at the bottom of each alignment block.
