# Supplementary material for: The Tc1/mariner transposable element family shapes genetic variation and gene expression in the protist Trichomonas vaginalis
Source: PubMed Central journal article supplement (PMC4021607; doi:10.1186/1759-8753-5-12), 2014-04-24
Supplement: 1759-8753-5-12-S6.pdf [file 1759-8753-5-12-S6.pdf]

**Additional File 5. Analysis of molecular variance (AMOVA) in *T. vaginalis* global isolates for 19**

***Tymar1* loci.**

| <b>Structure tested</b>                                      | <b>SS</b> | <b>VC</b> | <b>%VAR</b> | <b>P</b> |
|--------------------------------------------------------------|-----------|-----------|-------------|----------|
| <b>One group: SAF, WUS, EUS, MEX, ITA, AUS, PNG, LAB</b>     |           |           |             |          |
| Among groups                                                 | 40.11     | 0.14      | 9.96        | 0.00     |
| Among individuals within populations                         | 206.01    | 1.08      | 72.71       | 0.00     |
| Within individuals                                           | 24.00     | 0.25      | 17.33       | 0.00     |
| <b>Two groups: SAF vs. WUS, EUS, MEX, ITA, AUS, PNG, LAB</b> |           |           |             |          |
| Among groups                                                 | 19.78     | 0.46      | 24.99       | 0.00     |
| Among populations within groups                              | 20.32     | 0.04      | 2.32        | 0.00     |
| Among individuals within populations                         | 206.01    | 1.08      | 58.70       | 0.05     |
| Within individuals                                           | 24.00     | 0.25      | 13.99       | 0.12     |
